# Supplementary material
Source: PubMed Central journal article supplement (PMC1865584)
Supplement: msb4100142-s1.pdf [file msb4100142-s1.pdf]

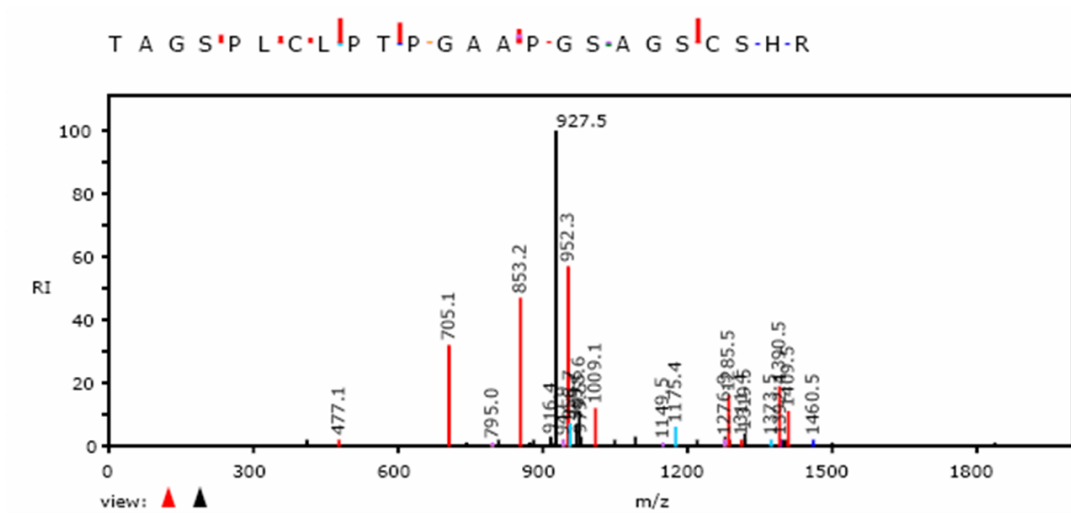

Supplemental Figure 1: MS/MS Spectrum from novel peptide TAGSPLCLPTPGAAPGSAGSC-SHR, found in PeptideAtlas dataset “raftaug”.





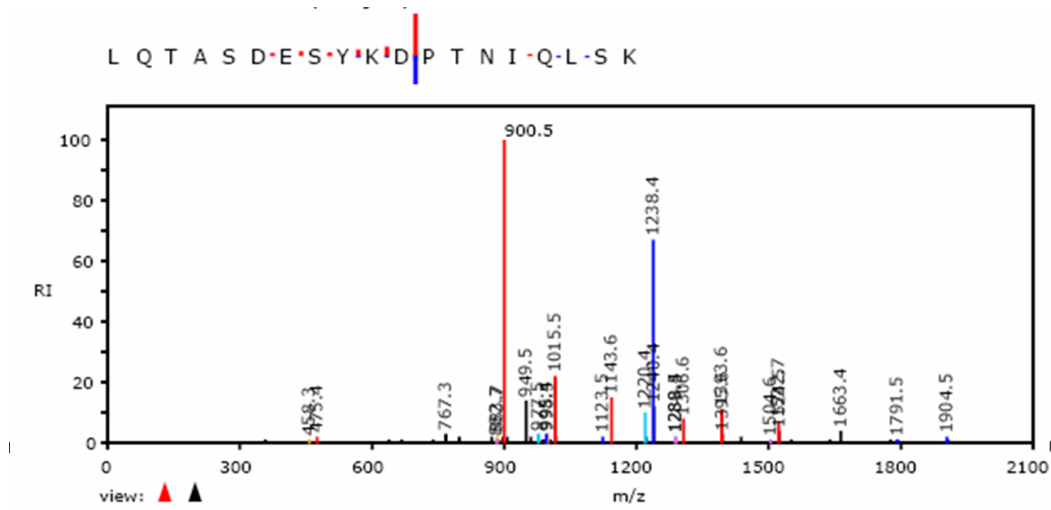

Supplemental Figure 4: MS/MS Spectrum from novel peptide LQTASDESYKDP T NIQLSK, found in PeptideAtlas dataset “raftflow”.

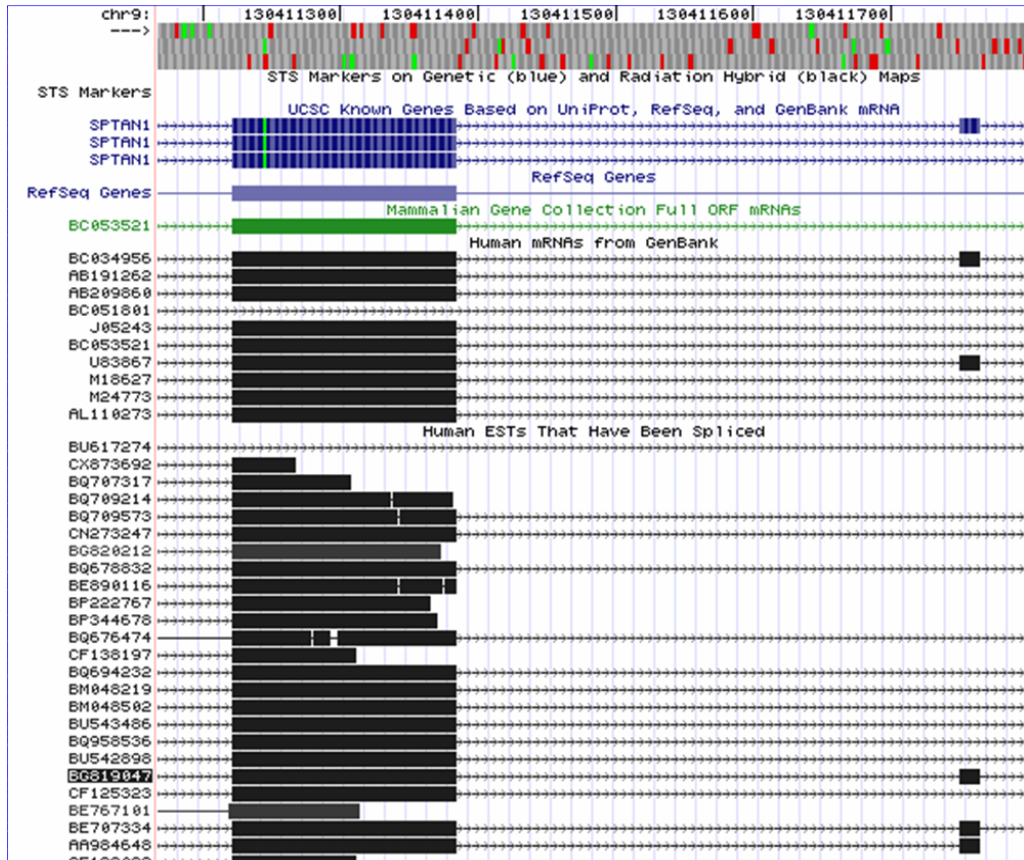

Supplemental Figure 5: UCSC genome browser screen-shot of region containing novel peptide LQTASDESYKDPTNIQLSK, found in PeptideAtlas dataset “raftflow”, showing micro-exon context.

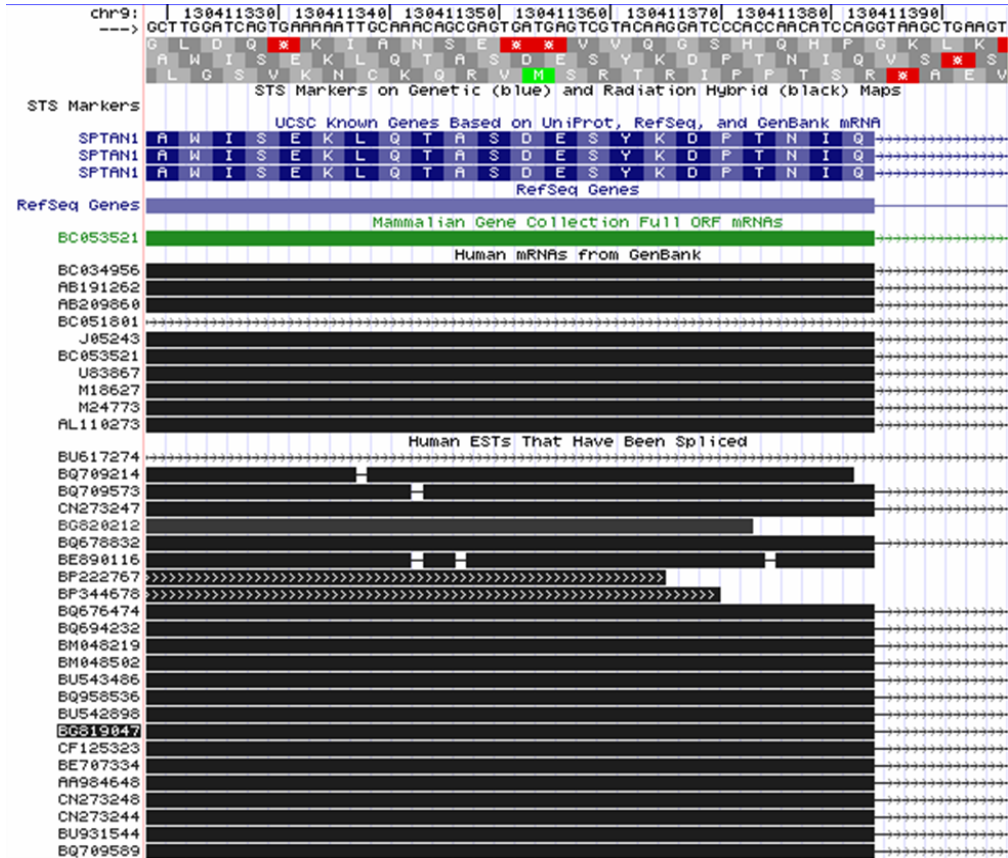

Supplemental Figure 6: UCSC genome browser screen-shot of region showing LQTAS-DESYKDPTNIQ from the 5' end of novel peptide LQTASDESYKDPTNIQLSK, found in PeptideAtlas dataset "raftflow".



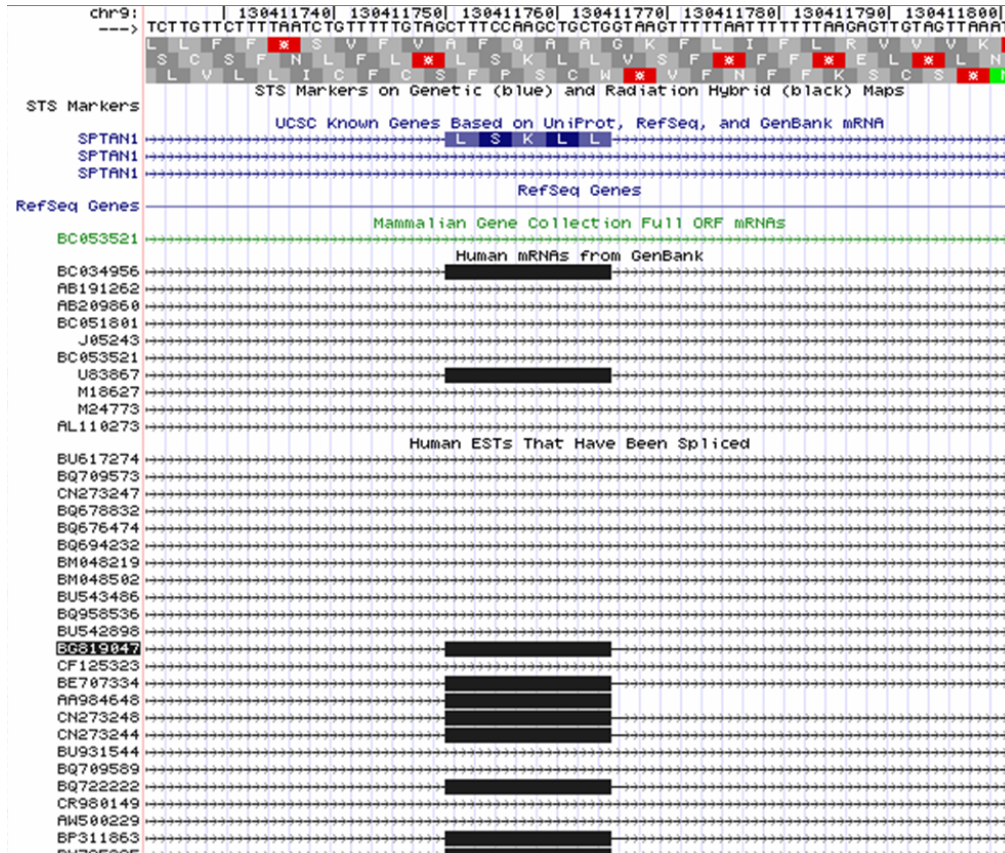

Supplemental Figure 7: UCSC genome browser screen-shot of region showing LSK from the 3' end of novel peptide LQTASDESYKDPTNIQLSK, found in PeptideAtlas dataset "raftflow".

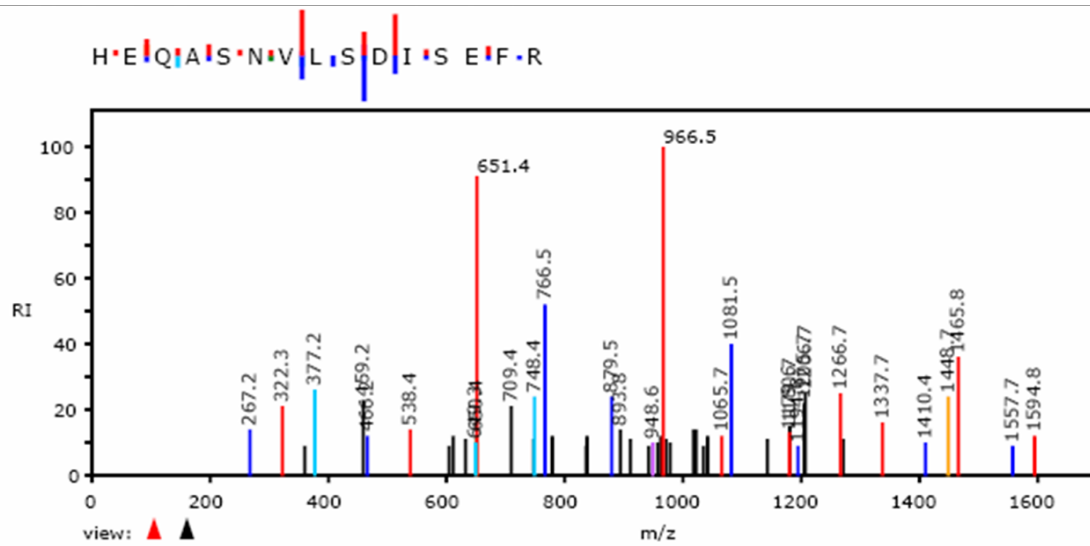

Supplemental Figure 8: MS/MS Spectrum from novel peptide HEQASNVLSLDISEFR, found in PeptideAtlas dataset A8\_IP.





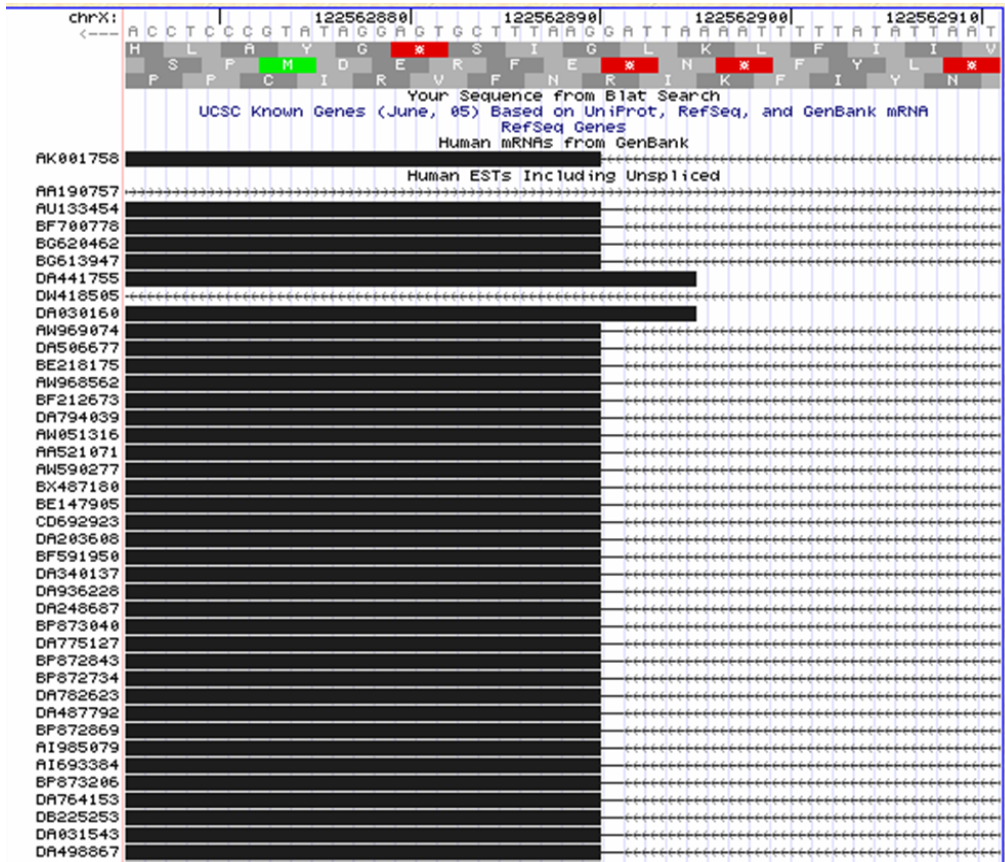

Supplemental Figure 10: UCSC genome browser screen-shot of region showing EFR from the 3' end of novel peptide HEQASNVLSDISEFR, found in PeptideAtlas dataset "A8\_IP".

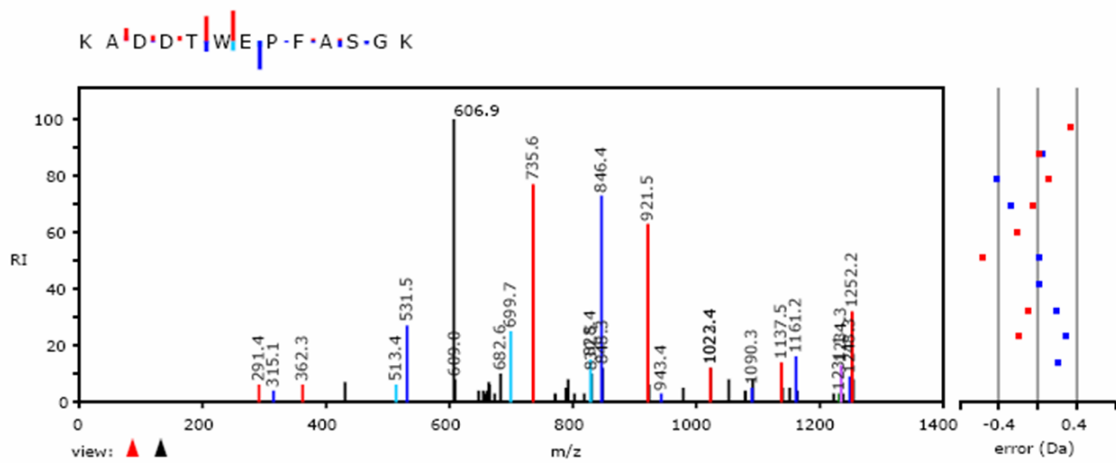

Supplemental Figure 11: MS/MS Spectrum from novel peptide KADDTWEPFASGK, found in HUPO PPP dataset “29\_b1-EDTA\_1”.





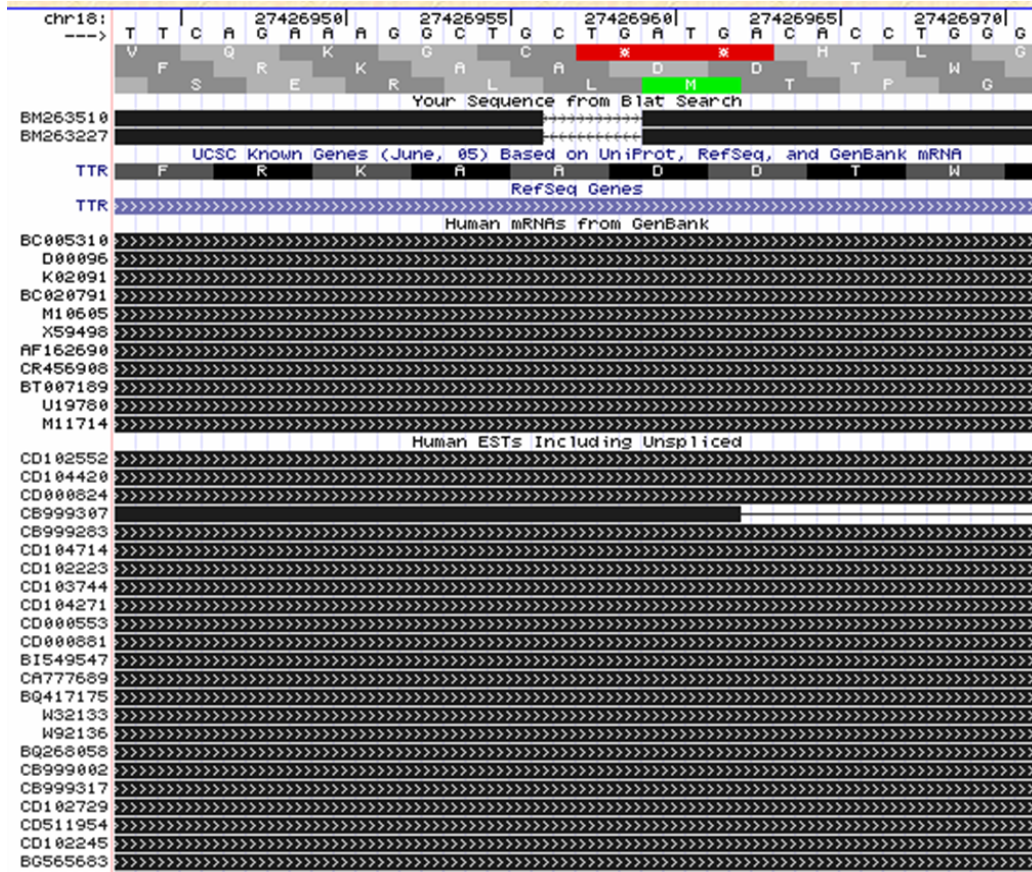

Supplemental Figure 14: UCSC genome browser screen-shot of region containing novel mutation in peptide KADDTWEPFASGK, found in HUPO PPP dataset “29\_b1-EDTA\_1”.

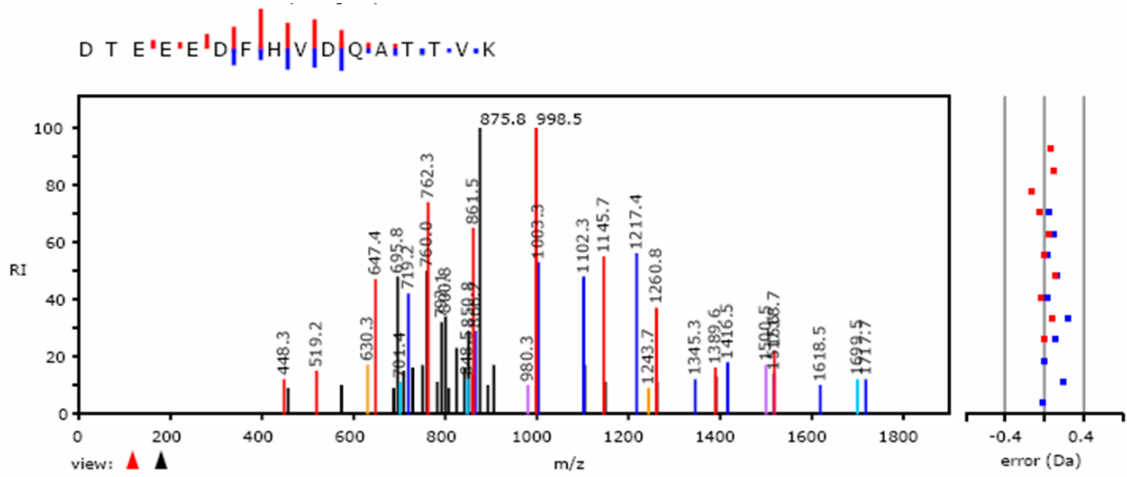

Supplemental Figure 15: MS/MS Spectrum from peptide DTEEEDFHVDQATTVK containing known coding SNP, found in HUPO PPP dataset from lab 40.



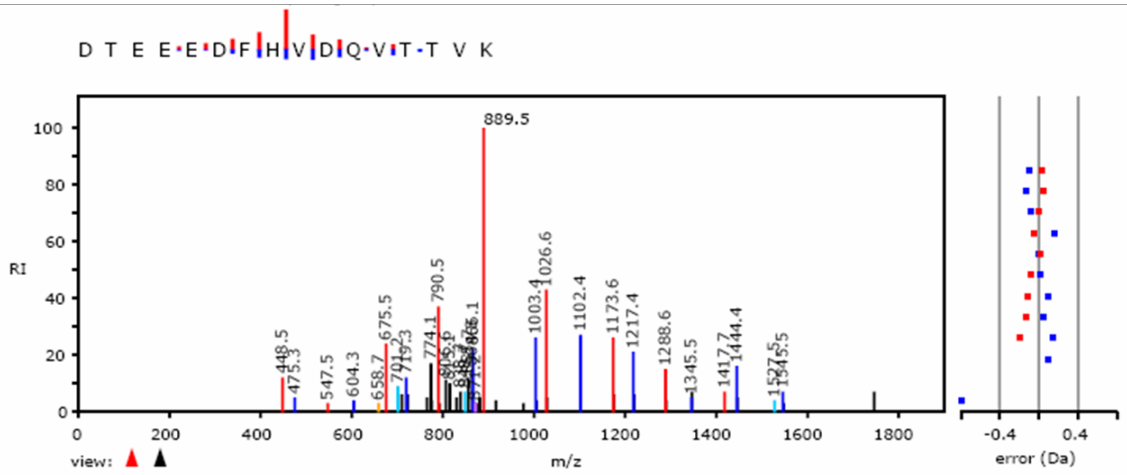

Supplemental Figure 16: MS/MS Spectrum from wild-type peptide DTEEEDFHVDQVTTVK found in HUPO PPP dataset 40.
